# Supplementary material for: Plasma enhanced label-free immunoassay for alpha-fetoprotein based on a U-bend fiber-optic LSPR biosensor
Source: Royal Society of Chemistry journal article supplement (doi:10.1039/c5ra02910d), 2015-01-01
Supplement: c5ra02910d1.pdf [file c5ra02910d1.pdf]

## Supplementary materials

### Plasma enhanced label-free immunoassay for alpha-fetoprotein based on a U-bent fiber-optic LSPR biosensor

Gaoling Liang<sup>a</sup>, Zhongjun Zhao<sup>a</sup>, Yin Wei<sup>d</sup>, Kunping Liu<sup>a,c</sup>, Wenqian Hou<sup>d</sup>, and Yixiang Duan<sup>b\*</sup>

<sup>a</sup>College of Chemistry, Sichuan University, Chengdu, China

<sup>b</sup>Research Center of Analytical Instrumentation, Key Laboratory of Bio-resource and Eco-environment, Ministry of Education, College of Life Science, Sichuan University, Chengdu, China

<sup>c</sup>Faculty of Biotechnology Industry, Chengdu University, Chengdu, China

<sup>d</sup>Analytical & Testing Center, Sichuan University, Chengdu, China

Address correspondence to Prof. Yixiang Duan, Research Center of Analytical Instrumentation, College of Life Science, Sichuan University, 29 Wangjiang Road, Chengdu 610064, China.

Fax: +86 28 85418180; Tel: +86 28 85418180; E-mail: [yduan@scu.edu.cn](mailto:yduan@scu.edu.cn)

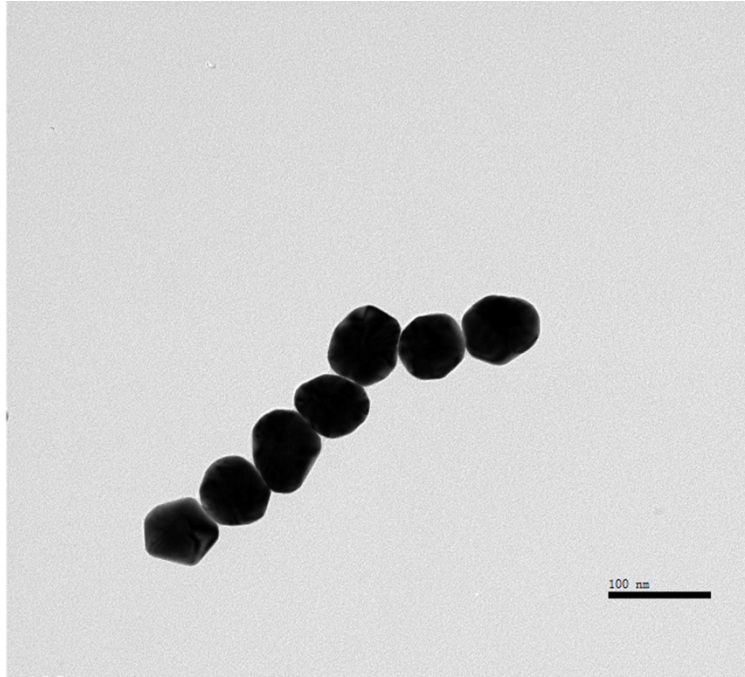

**Fig. S1.** Transmission electron microscopy (TEM) image of the synthesized gold nanoparticles

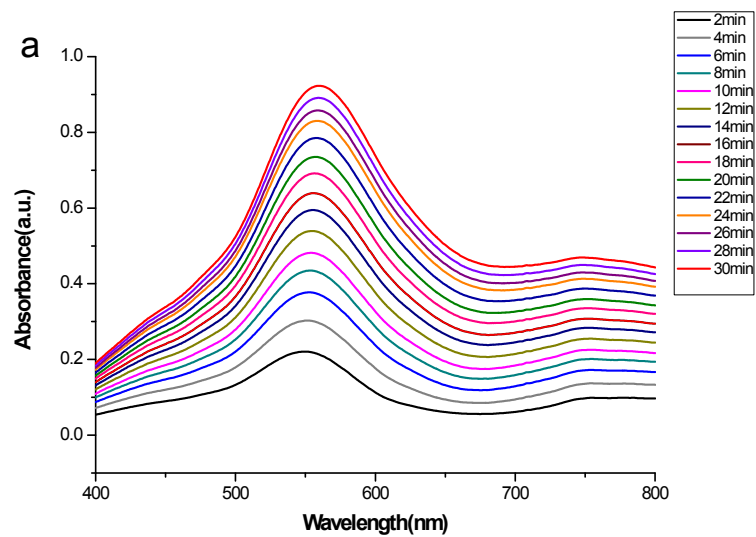

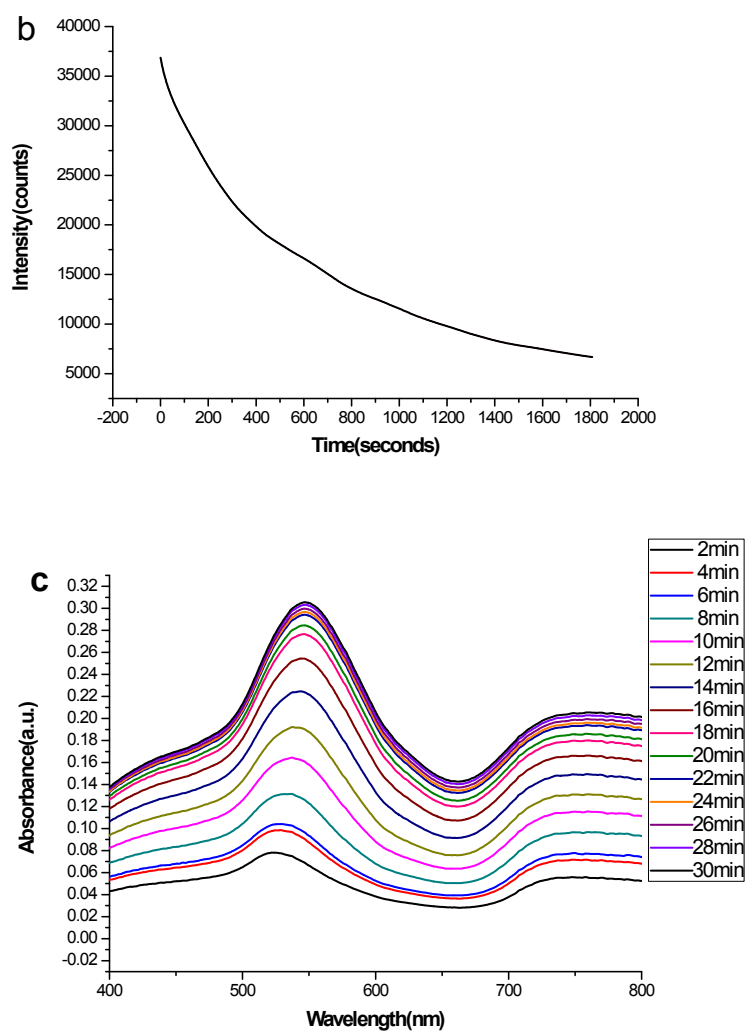

**Fig. S2.** (a) Absorbance spectrum of the GNP bound to U-bend fiber optic probe with plasma pretreatment (the assembly time corresponds to the absorbance spectrum from the bottom to the top). (b) Real-time light intensity response was observed at 550 nm. (c) Absorbance spectrum of the GNP bound to the U-bend fiber optic probe without plasma pretreatment.

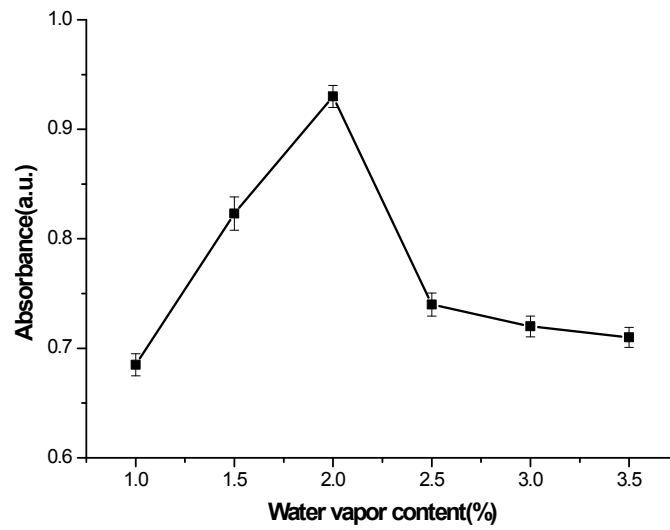

**Fig. S3.** The optimal experiment about the H<sub>2</sub>O/Ar gas mixture ratio: the absorbance obtained from GNPs coated U-bend fiber optic probe with different water vapor content H<sub>2</sub>O/Ar plasma pretreatment.

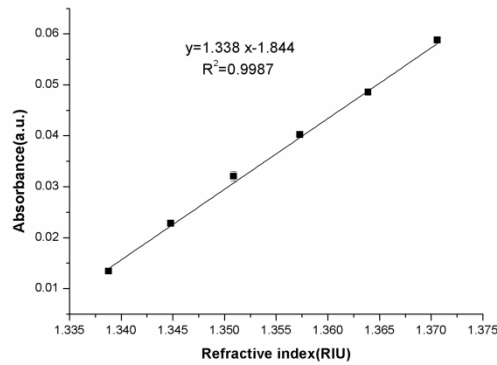

**Fig. S4.** Absorbance changes obtained with straight fiber probes (4 cm probe length, 600  $\mu\text{m}$  core diameter and a numerical aperture (NA) of 0.37) for the different sucrose solutions.

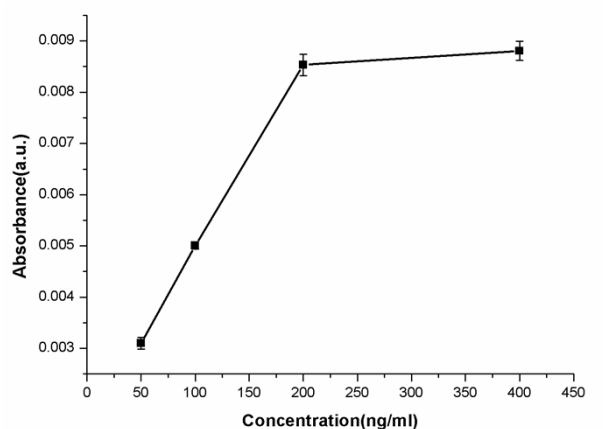

**Fig. S5.** Relationship between the AFP concentration in PBS versus the normalized absorbance signal (n=3).

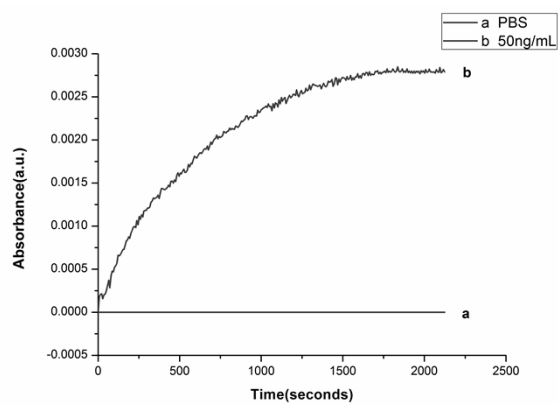

**Fig. S6.** (a) Baseline response of AFP immobilized probe immersed in PBS buffer. (b) Real-time absorbance changes at 584 nm during the binding of 50 ng/mL AFP-anti AFP.

**Table 1** Comparison of the results obtained with the proposed method and other methods for AFP detection

| Analytical method                     | Sample | LOD        | Linear range           | Reference |
|---------------------------------------|--------|------------|------------------------|-----------|
| Fluoroimmunoassay                     | Serum  | 11.2 ng/mL | /                      | 10        |
| RIA                                   | Serum  | 0.66 ng/mL | /                      | 11        |
| ELISA                                 | Serum  | 9.2 ng/mL  |                        | 15        |
| Electrochemical<br>Immunosensor       | Serum  | 0.81 ng/mL | 1-500 ng/mL            | 12        |
| LSPCF                                 | PBS    | /          | 0.1-100 ng/mL          | 40        |
|                                       | Serum  | /          | 2.33-143.74 ng/mL      |           |
| Gold Nanorods-based<br>LSPR Biosensor | PBS    | 16.5 ng/mL | 16.5 ng/mL-943.8 ng/mL | 16        |
| Plasma-enhanced LSPR biosensor        | PBS    | 0.85 ng/mL | 5-200 ng/mL            |           |
|                                       | Serum  | 3.3 ng/mL  | 5-200 ng/mL            |           |
